# Supplementary material
Source: PubMed Central journal article supplement (PMC11455448)
Supplement: NIHMS2019408-supplement-Supplementary_information.pdf [file NIHMS2019408-supplement-Supplementary_information.pdf]

**A**

| Gene           | log2 values of normalized counts |                 |                 |                 |                 |                 |                  |                  |                  |                      | ensID |
|----------------|----------------------------------|-----------------|-----------------|-----------------|-----------------|-----------------|------------------|------------------|------------------|----------------------|-------|
|                | col9a2_1_counts                  | col9a2_2_counts | col9a2_3_counts | double_1_counts | double_2_counts | double_3_counts | entpd5a_1_counts | entpd5a_2_counts | entpd5a_3_counts |                      |       |
| <i>bmp3</i>    | 11.27977562                      | 12.66457397     | 11.6543871      | 15.91815443     | 16.47850472     | 16.38700252     | 13.97214311      | 14.66737167      | 14.20430542      | ENS DARG00000060526  |       |
| <i>bmp4</i>    | 11.0026377                       | 10.78496789     | 11.50191458     | 12.01649489     | 12.03647987     | 12.48733083     | 12.25845735      | 12.34805052      | 13.62846987      | ENS DARG00000019995  |       |
| <i>bmp2a</i>   | 10.06556345                      | 8.965991578     | 8.728933857     | 10.08575844     | 7.650191321     | 9.525370863     | 11.87052567      | 12.61772396      | 11.96378661      | ENS DARG00000013409  |       |
| <i>bmp2b</i>   | 10.2397738                       | 9.459814605     | 10.75925867     | 11.4577604      | 9.320242878     | 11.28192506     | 12.8023041       | 13.95367946      | 13.37085438      | ENS DARG00000041430  |       |
| <i>bmp8a</i>   | 9.486890802                      | 7.450859886     | 7.889504866     | 10.77952179     | 9.107323615     | 10.52409691     | 13.11436387      | 13.32969306      | 12.45643194      | ENS DARG00000035677  |       |
| <i>bmpr1ba</i> | 11.81129064                      | 12.31382658     | 12.51580288     | 11.5442793      | 11.33377504     | 11.46085362     | 11.57216909      | 12.35347787      | 12.33115027      | ENS DARG00000104100  |       |
| <i>bmpr1aa</i> | 10.78587328                      | 11.32171535     | 11.59580126     | 12.05229699     | 12.32428836     | 12.94886954     | 11.32681758      | 11.95267932      | 12.20743385      | ENS DARG00000019728  |       |
| <i>bmpr1ab</i> | 10.06167997                      | 10.53396251     | 10.87448863     | 10.71017724     | 10.424513       | 11.11938179     | 11.10497627      | 11.9233329       | 12.10947803      | ENS DARG00000105045  |       |
| <i>acvr1l</i>  | 10.81609148                      | 11.44831177     | 11.46367475     | 11.52647421     | 12.0234621      | 12.27347295     | 11.05257965      | 11.53150728      | 11.48143615      | ENS DARG00000014986  |       |
| <i>acvr1ba</i> | 10.07066122                      | 10.83662926     | 11.09986914     | 12.15450478     | 12.99577609     | 13.49715467     | 10.1655892       | 10.91644081      | 12.33538021      | ENS DARG00000018968  |       |
| <i>bmpr2a</i>  | 9.431405141                      | 9.088991002     | 8.430108403     | 9.952772366     | 10.420135       | 9.755059851     | 10.912777        | 10.27087552      | 9.982643397      | ENS DARG00000011941  |       |
| <i>fst1b</i>   | 13.68811267                      | 14.09594879     | 14.00891585     | 14.26454748     | 14.57189534     | 14.46478497     | 15.17118561      | 15.02386405      | 14.44219354      | ENS DARG00000039576  |       |
| <i>nog1</i>    | 7.550475551                      | 6.553137474     | 8.08891578      | 7.4021131       | 6.79402873      | 7.566249135     | 9.65851836       | 8.682036578      | 9.93551889       | ENS DARG00000058819  |       |
| <i>nog2</i>    | 10.23613525                      | 10.83778827     | 9.266944218     | 14.01517388     | 14.26426251     | 14.4426111      | 11.53204641      | 11.28531561      | 12.14746596      | ENS DARG00000043066  |       |
| <i>nog3</i>    | 14.95812177                      | 15.30940626     | 15.12671272     | 15.82951733     | 16.16907865     | 16.02517092     | 12.93856384      | 12.44630011      | 12.74173462      | ENS DARG00000053528  |       |
| <i>bmp8r</i>   | 10.89639315                      | 9.43035056      | 10.51737087     | 11.97899432     | 10.09684915     | 11.32489326     | 14.04926434      | 14.36860089      | 13.76106654      | ENS DARG000000101980 |       |
| <i>id2a</i>    | 13.68227913                      | 13.88144871     | 15.18928544     | 15.63863813     | 15.968894       | 16.45979076     | 13.64061764      | 14.67406185      | 14.40168461      | ENS DARG00000055283  |       |

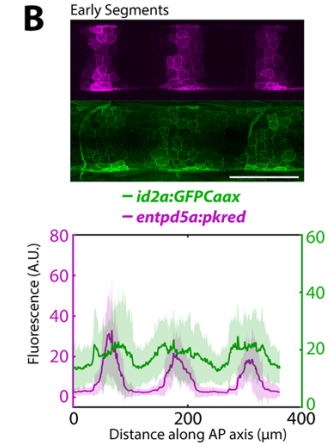

**Figure S1: Normalized RNA sequencing values and *id2a* data. Related to Figure 1.**

**A)** Counts were normalized based on gene lengths that were obtained through ensembl.org. Normalized counts were transformed logarithmically for ease of viewing.

**B)** Confocal image of early stage larvae containing *id2a:GFPCaax* and *entpd5a:pkred* transgenes. *id2a:GFPCaax* signal overlaps domains containing *entpd5a:pkred*. n=3 fish

**B')** Fluorescence intensity plot showing overlap of the two expression patterns in (B), with *id2a:GFPCaax* peaks extending more broadly along the AP axis.

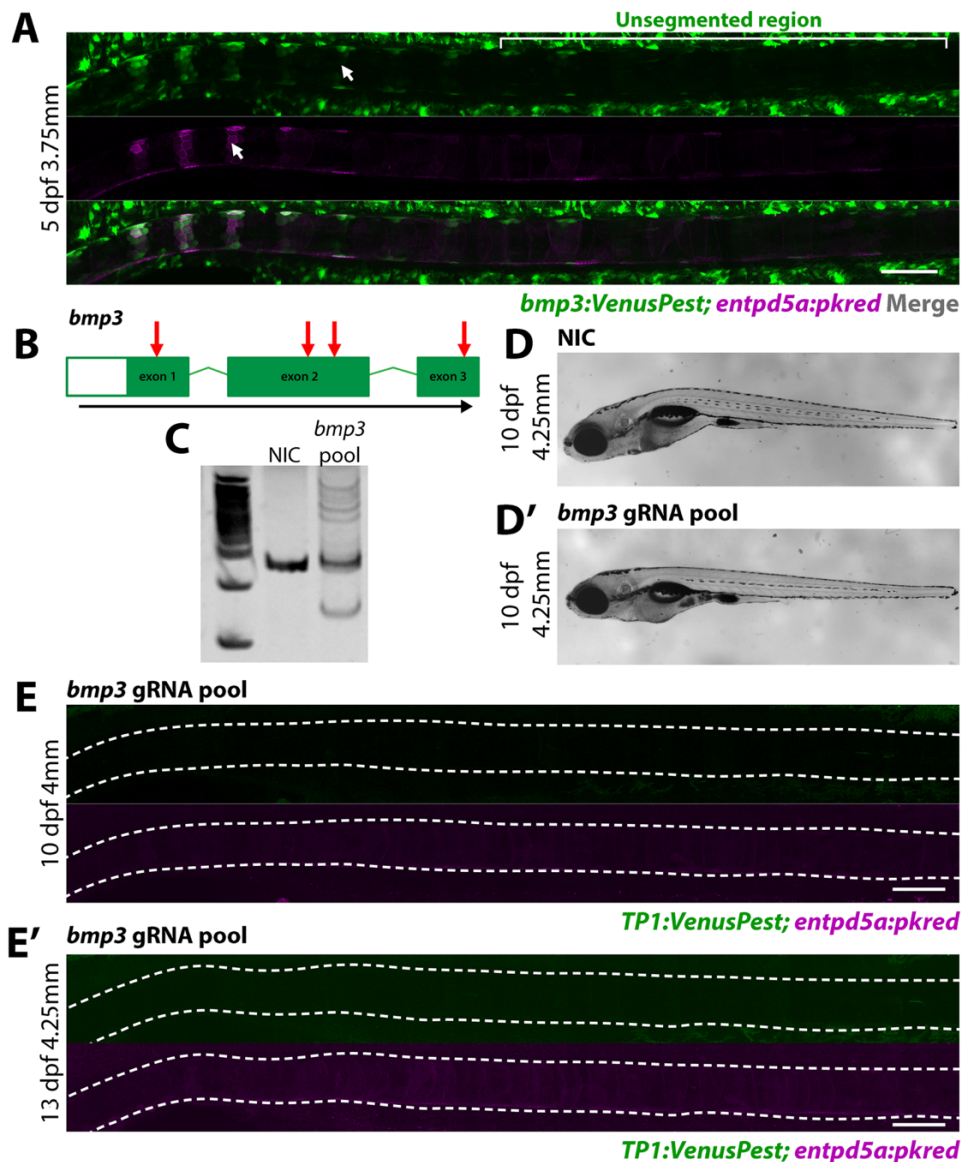

**Figure S2: Additional *bmp3* expression and loss of function data. Related to Figure 2.**

**A)** Digitally stitched confocal images of the endogenous *bmp3:VenusPest* reporter and *entpd5a:pkred* in a 5 day old larva. *bmp3* is initially off in the unsegmented sheath and gets activated prior to *entpd5a*. Arrows mark the last visible segments in the anterior. The bracket highlights the unsegmented region in which *bmp3* and *entpd5a* are not yet expressed.

**B)** Illustration depicting gRNA target sites generated for *bmp3*.

**C)** PCR analysis showing gRNA efficiency. Indels in the *bmp3* sequence are generated following pooled gRNA injection. Wild type band is 238 base pairs (bp).

**D, D')** Brightfield images of NIC and fish injected with *bmp3* gRNA pool. Injected fish do not display obvious signs of developmental delay.

**E, E')** An individual fish injected with the *bmp3* CRISPR pool imaged at 10 (**D**) and 13 dpf (**D'**). Neither *entpd5a:pkred* nor *TP1:VenusPest* have been activated, indicating segmentation was completely blocked. This phenotype was observed in 4/10 injected fish.

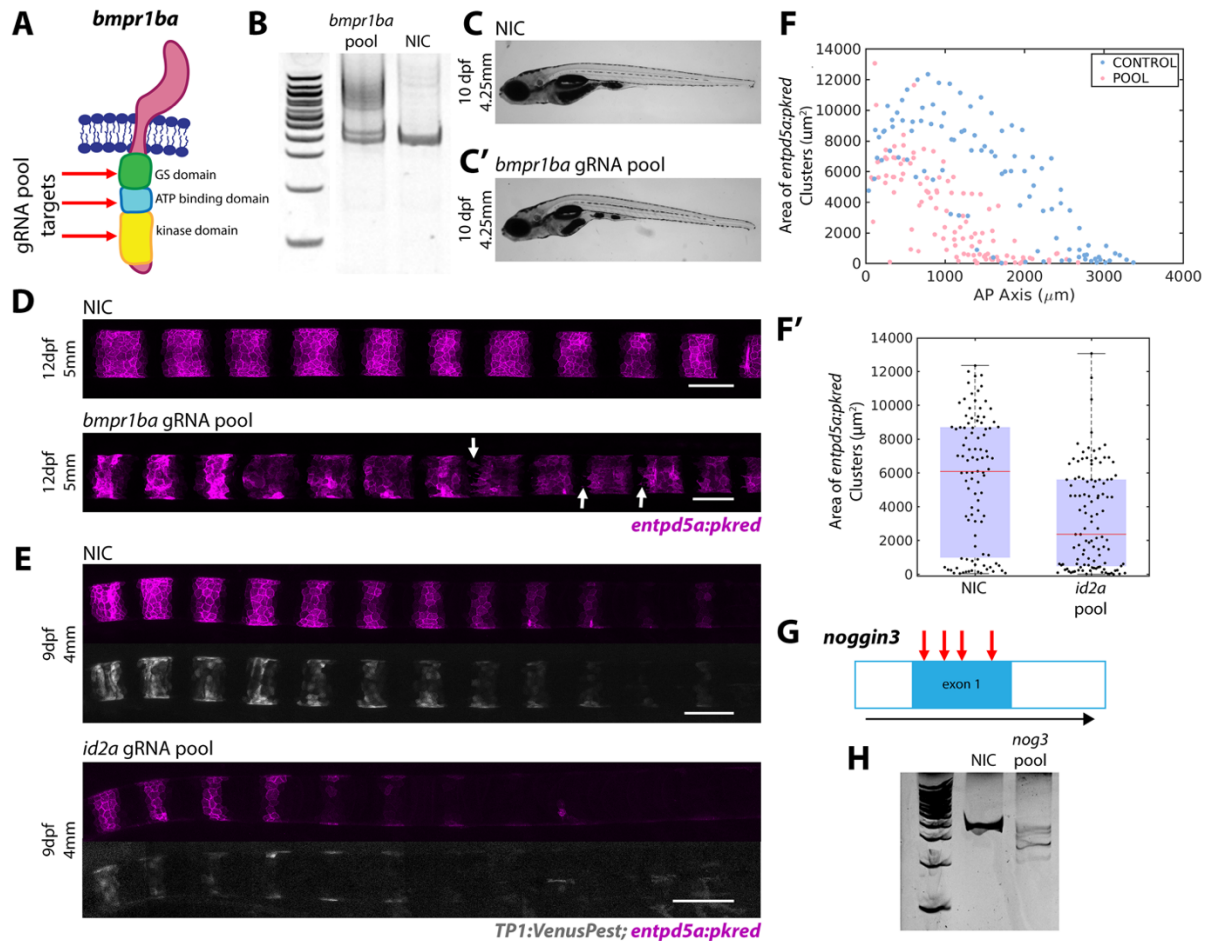

**Figure S3: Targeting of *bmpr1ba* and *id2a*. Related to Figures 3 and 4.**

**A)** Cartoon illustrating the regions targeted with gRNAs in *bmpr1ba*.

**B)** PCR analysis of gRNA efficiency. Indels in the *bmpr1ba* sequence are generated following pooled gRNA injection. Wild type band is 346 bp.

**C, C')** DIC images of NIC (**C**) and *bmpr1ba* (**C'**) gRNA injected fish at 10 dpf and 4.25mm SL.

**D)** NIC and *bmpr1ba* gRNA injected fish at similar developmental stages (12 dpf, 5mm standard length). Targeting *bmpr1ba* periodically led to the development of irregularly shaped segments with jagged boundaries (arrows).

**E)** NIC and *id2a* gRNA injected fish at similar developmental stages (9 dpf, 4mm standard length). Loss of *id2a* led to delayed segment growth.

**F)** The area of *entpd5a*<sup>+</sup> cell clusters were measured along the AP axis in larvae injected with *id2a* gRNAs and controls at 9 dpf. Loss of *id2a* led to a decrease in segment area along the AP axis. NIC n = 4, *id2a* pools n = 6.

**F')** Area distribution plot of data depicted in (**F**). NIC n = 4, *id2a* gRNA pool n = 6. p value = 2.5595e-06

**G)** Illustration depicting gRNA target sites generated for *noggin3*.

**H)** PCR analysis of gRNA efficiency. Indels in the *noggin3* sequence are generated following pooled gRNA injection. Wild type band is 387 bp.
